1 Title: Pooling of samples for SARS-CoV-2 detection using rapid antigen tests

2

3 Authors: Nol Salcedo<sup>1</sup>, Alexander Harmon<sup>1</sup>, Bobby Brooke Herrera<sup>1,2‡</sup>

4

5 Affiliations:

6 <sup>1</sup>E25Bio, Inc., Cambridge, MA, USA

7 <sup>2</sup>Department of Immunology and Infectious Diseases, Harvard T.H. Chan School of Public  
8 Health, Boston, MA, USA

9

10 ‡Corresponding Author: BBH, [bbherrera@e25bio.com](mailto:bbherrera@e25bio.com)

11

12 Key Words: SARS-CoV-2, COVID-19, rapid antigen test, pooled testing

13

14

15

16

17

18

19

20

21

22

23

24

25

26

27 Abstract

28

29           While molecular assays, such as reverse-transcription polymerase chain reaction (RT-  
30 PCR), have been widely used throughout the coronavirus disease 2019 (COVID-19) pandemic,  
31 the technique is resource intensive and costly. As a means to reduce costs and expand  
32 diagnostic efficiency, pooled testing using RT-PCR has been implemented. However, pooled  
33 testing using rapid antigen tests has not been evaluated. Here, we propose a pooling strategy  
34 for rapid antigen testing that would significantly expand COVID-19 surveillance, especially for  
35 low-to-middle income countries, and schools and workplaces. Our data demonstrate that  
36 combining of up to 20 samples per pool can expand surveillance with rapid antigen tests, even if  
37 a pool contains only one positive sample.

38

39

40

41

42

43

44

45

46

47

48

49

50

51

52

## 53 Background

54

55 With ongoing worldwide transmission of severe acute respiratory syndrome coronavirus  
56 2 (SARS-CoV-2), laboratory testing has played an important role in detecting the virus in  
57 symptomatic and asymptomatic individuals. Molecular assays, such as reverse-transcription  
58 polymerase chain reaction (RT-PCR), are accurate but costly, challenging large scale  
59 surveillance efforts, especially for low-to-middle income countries.

60 Pooling subsamples and processing them in groups by RT-PCR has been proposed as  
61 a testing strategy to reduce costs (1). A recent study demonstrated that a range of positive  
62 pools could be identified, even if the Ct value of a single sample was up to 34 (2). Public health  
63 surveillance tools, such as rapid antigen tests, have also been advocated for since early in the  
64 pandemic to help control SARS-CoV-2 spread. Rapid antigen tests are optimized to identify  
65 infectious individuals, and can be self-administered or performed at the point-of-care, leading to  
66 faster sample to result time and more frequent testing (3). However, pooled testing using rapid  
67 antigen tests, has not been evaluated.

68

## 69 Results

70

71 We propose a pooling strategy for antigen testing that is easy to implement and can  
72 further expand COVID-19 surveillance. To analyze the effect of sample pooling on the analytical  
73 sensitivity of a rapid antigen test, we compared antigen detectability of single nasal swab  
74 specimens with varying Ct values versus when pooled into 19 negative nasal swab specimens.  
75 Antigen detectability was determined by applying 100  $\mu$ l of the single specimen or pooled  
76 sample to the rapid antigen test (E25Bio, Inc.). Ct values and viral load (VL) for each positive  
77 nasal swab specimen was determined by extracting RNA via the QIAamp Viral RNA Kit  
78 (Qiagen) and measured using the CDC's 2019-nCoV Real-Time RT-PCR N1 assay on the

79 QuantStudio 5 Real-Time PCR System (Applied Biosystems). The primary studies under which  
80 the samples and data were collected received ethical clearance from the non-profit PATH  
81 ([www.path.org](http://www.path.org)) Institutional Review Board (IRB) (approval number 00004244.) All excess  
82 samples and corresponding data were banked and de-identified prior to analysis. This study  
83 received an exemption determination from the PATH IRB.

84 Our results show that the rapid antigen test detected positive pools between Ct values  
85 18.3 (VL: 7.6E7) and 28.5 (VL: 6.7E4), compared to 18.3 and 29.1 (VL: 4.8E4) for single nasal  
86 swab specimens (Figure). These data suggest that combining of up to 20 samples per pool can  
87 expand surveillance with rapid antigen tests, even if a pool contains only one positive sample.  
88 Only in the case of a positive pool test result is additional rapid antigen testing and/or RT-PCR  
89 of individual samples required. Notably, specimens collected and screened beyond the acute  
90 infection phase (7 days post-infection) will likely escape detection by a rapid antigen test,  
91 regardless if the specimen is pooled or non-pooled (data not shown).

92

## 93 Conclusion

94

95 Pooled testing using rapid antigen tests can be a cost-effective and efficient public  
96 health approach to expand COVID-19 surveillance, especially for low-to-middle income  
97 countries and schools or workplaces.

98

## 99 Competing Interests

100

101 NS, AH, and BBH are employed by E25Bio, Inc., a biotechnology company that develops  
102 diagnostic assays for fever-causing infectious diseases.

103

## 104 References

- 105 1. Tromberg BJ, Schwetz TA, Perez-Stable EJ, Hodes RJ, Woychik RP, Bright RA, et al.  
106 Rapid Scaling Up of Covid-19 Diagnostic Testing in the United States - The NIH RADx Initiative.  
107 N Engl J Med. 2020;383(11):1071-7.
- 108 2. Lohse S, Pfuhl T, Berko-Gottel B, Rissland J, Geissler T, Gartner B, et al. Pooling of  
109 samples for testing for SARS-CoV-2 in asymptomatic people. Lancet Infect Dis.  
110 2020;20(11):1231-2.
- 111 3. Larremore DB, Wilder B, Lester E, Shehata S, Burke JM, Hay JA, et al. Test sensitivity is  
112 secondary to frequency and turnaround time for COVID-19 screening. Sci Adv. 2020.

113

114

115

116

117

118

119

120

121

122

123

124

125

126

127

128

129

130

131  
132  
133  
134  
135

Figure

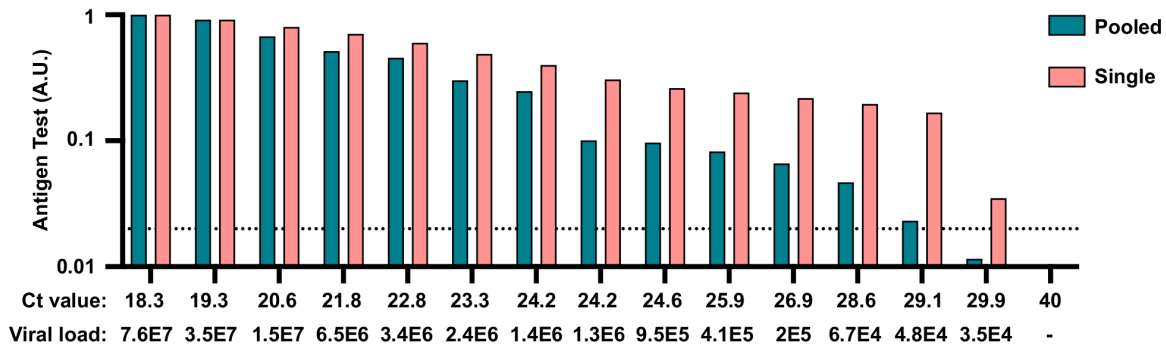

136  
137  
138  
139  
140  
141  
142  
143  
144  
145  
146  
147  
148  
149  
150

Figure Legend

Figure: Analytical sensitivity of a rapid antigen test using single nasal swab specimens versus pooled samples

Nasal swabs were collected into 300  $\mu$ l saline buffer. 100  $\mu$ l of the positive nasal swab specimens with Ct values ranging between 18.3 and 29.9 were spiked into 100  $\mu$ l of 19 negative nasal swab specimens. 100  $\mu$ l of the pooled samples or 100  $\mu$ l of the single positive nasal swab specimens were applied to the antigen test and allowed to run for 15 minutes before visual test results were image captured. To determine relative nucleocapsid antigen levels detected by the antigen test, images were analyzed using image processing software. Briefly, a R (version 4.0.3) script running on a desktop computer was activated upon DropBox sync and called ImageJ (NIH) to perform the image analysis on the uploaded file. ImageJ quantified the pixel intensities at the antigen test background and test areas, and generated a normalized intensity,

151 calculated by dividing the cumulative intensity of the test area by the cumulative intensity of the  
152 background area. Ct, cycle threshold. Horizontal dashed line, limit of detection for the antigen  
153 test.  
154
